# Supplementary material
Source: Springer Nature journal article supplement (https://www.springermedizin.de/resource/supplementary/12904_2012_146_MOESM1_ESM.pdf/9517724)
Supplement: MOESM1 [file 9517724]

## **Pre-project Phase – 2008/9**

1. Development of CPC Textbook for Africa (Launched Sep 2009)
2. Discussions with experts re CPC in the region.

## **Phase 1 -2009**

1. Identifying sites and navigators
2. Development of curriculum

## **Phase 2 – Sep-Dec 2009**

1. Navigators trained to deliver course
2. Clinical placements for the navigators in South Africa

## **Phase 3 – 2010 -12**

1. Navigators undertake situational analysis and CPC needs assessment at the Beacon Centres
2. Set up and deliver CPC training through the Beacon Centres
3. Set up Baobab website in South Africa as a CPC virtual resource centre
4. Train critical mass of individuals in CPC
5. Provide mentorship and support
6. Share experiences at conferences as appropriate
